# Supplementary material for: Euchromatic Supernumerary Chromosomal Segments—Remnants of Ongoing Karyotype Restructuring in the Prospero autumnale Complex?
Source: MDPI journal article supplement (doi:10.3390/genes9100468), 2018-09-27
Supplement: s1 [file s1]

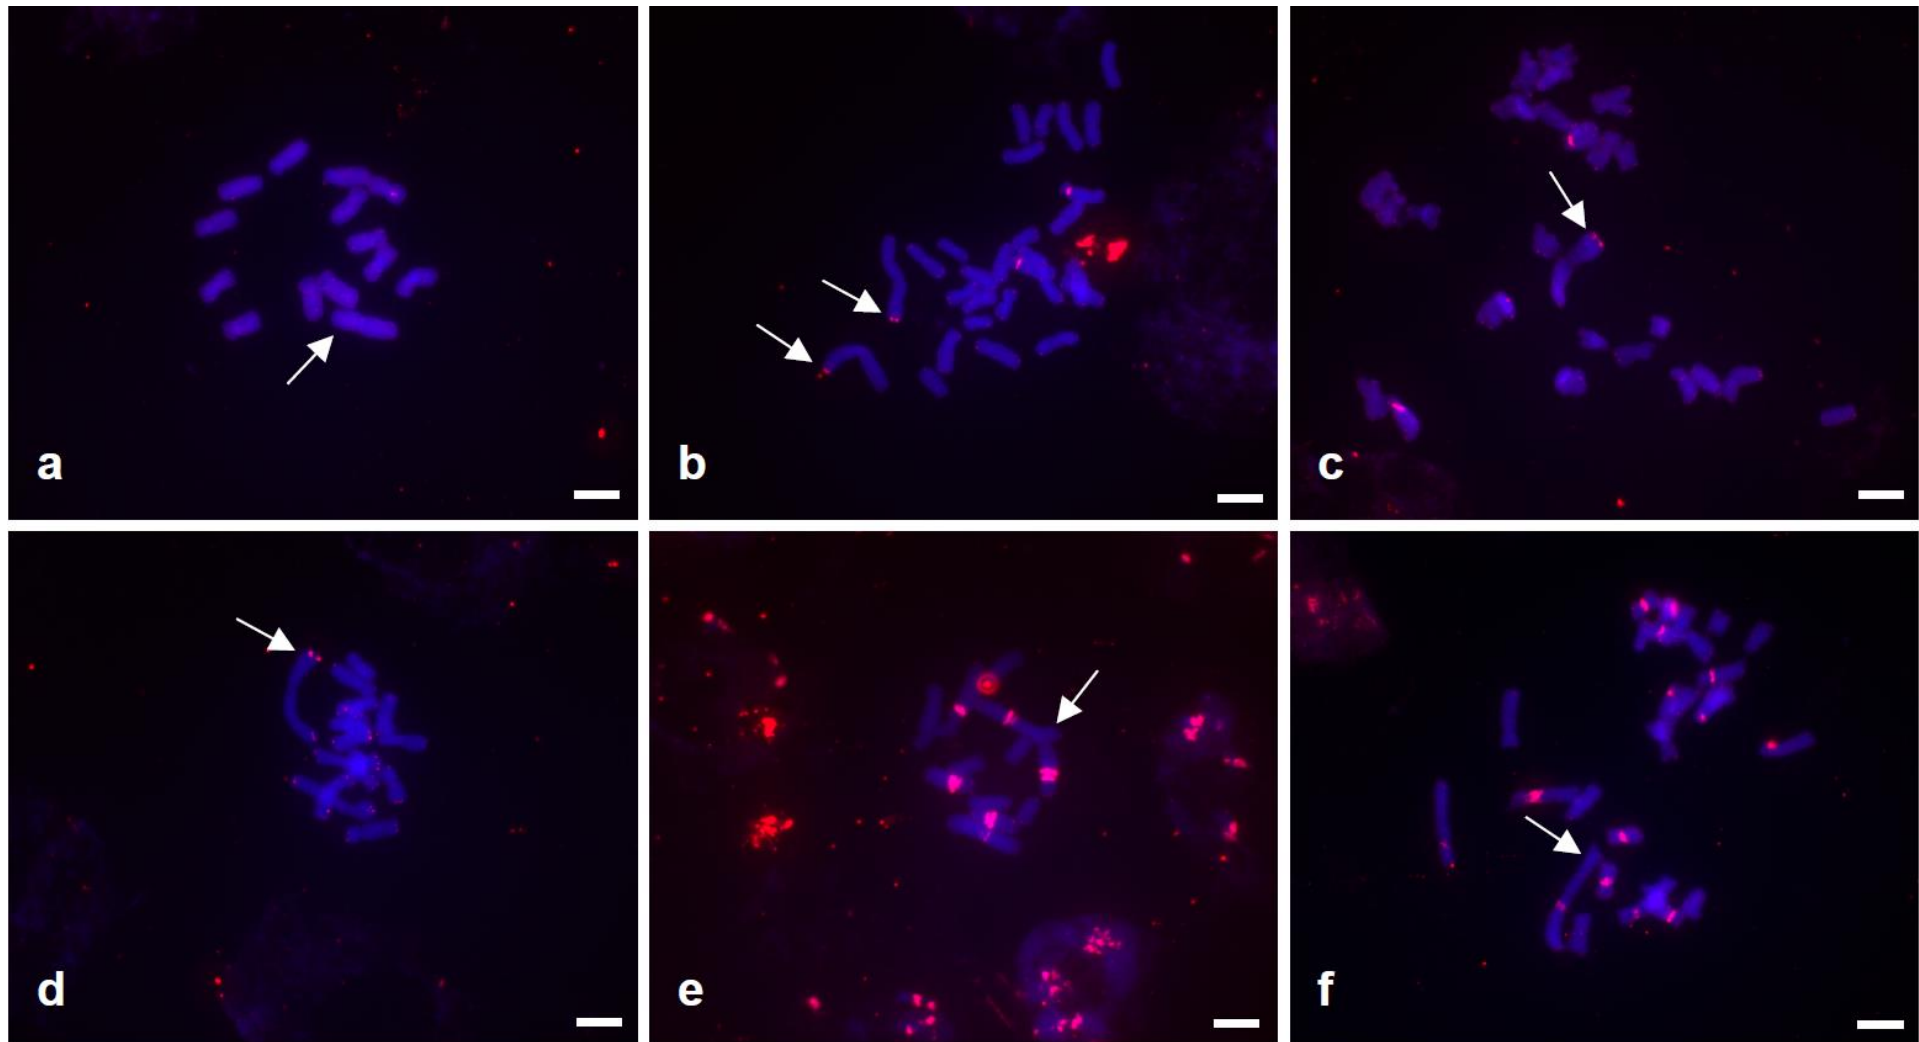

**Figure S1.** Localisation of Cy3-labelled telomeric (TTAGGG)<sub>n</sub> repeats in supernumerary chromosomal segments (SCSs) (arrowed) in diploid and polyploid cytotypes of the *Prospero autumnale* complex. **(a)** H541 (cytotype AA with one SCS), **(b)** H110-1 (cytotype AAB<sup>7</sup>B<sup>7</sup> with two SCSs), **(c)** H110-2 (cytotype AAB<sup>7</sup>B<sup>7</sup> with one SCS), **(d)** H641 (cytotype B<sup>7</sup>B<sup>7</sup> with one SCS), **(e)** H258 (B<sup>6</sup>B<sup>7</sup> hybrid with one SCS), **(f)** H574-1 (cytotype B<sup>6</sup>B<sup>6</sup>B<sup>7</sup>B<sup>7</sup> with one SCS). Bar = 5 µm.
